# Supplementary material
Source: publisher figshare collection journal article supplement (https://acs.figshare.com/ndownloader/files/3807259)
Supplement: Supplementary file 1 [file 3807259]

 
data_gabianphcc 
 
_audit_creation_method            SHELXL-97 
_chemical_name_systematic 
; 
 ? 
; 
_chemical_name_common             ? 
_chemical_melting_point           ? 
_chemical_formula_moiety          ? 
_chemical_formula_sum 
 'C56 H60 Ga N2 O' 
_chemical_formula_weight          846.78 
 
loop_ 
 _atom_type_symbol 
 _atom_type_description 
 _atom_type_scat_dispersion_real 
 _atom_type_scat_dispersion_imag 
 _atom_type_scat_source 
 'C'  'C'   0.0033   0.0016 
 'International Tables Vol C Tables 4.2.6.8 and 6.1.1.4' 
 'H'  'H'   0.0000   0.0000 
 'International Tables Vol C Tables 4.2.6.8 and 6.1.1.4' 
 'N'  'N'   0.0061   0.0033 
 'International Tables Vol C Tables 4.2.6.8 and 6.1.1.4' 
 'O'  'O'   0.0106   0.0060 
 'International Tables Vol C Tables 4.2.6.8 and 6.1.1.4' 
 'Ga'  'Ga'   0.2307   1.6083 
 'International Tables Vol C Tables 4.2.6.8 and 6.1.1.4' 
 
_symmetry_cell_setting            Triclinic 
_symmetry_space_group_name_H-M    'P-1' 
 
loop_ 
 _symmetry_equiv_pos_as_xyz 
 'x, y, z' 
 '-x, -y, -z' 
 
_cell_length_a                    10.5177(4) 
_cell_length_b                    11.8367(4) 
_cell_length_c                    19.8797(7) 
_cell_angle_alpha                 79.654(3) 
_cell_angle_beta                  85.269(3) 
_cell_angle_gamma                 85.892(3) 
_cell_volume                      2422.31(14) 
_cell_formula_units_Z             2 
_cell_measurement_temperature     100(2) 
_cell_measurement_reflns_used     3974 
_cell_measurement_theta_min       2.9066 
_cell_measurement_theta_max       32.5298 
 
_exptl_crystal_description        prism 
_exptl_crystal_colour             brown 
_exptl_crystal_size_max           0.40 
_exptl_crystal_size_mid           0.20 
_exptl_crystal_size_min           0.20 
_exptl_crystal_density_meas       ? 
_exptl_crystal_density_diffrn     1.161 
_exptl_crystal_density_method     'not measured' 
_exptl_crystal_F_000              898 
_exptl_absorpt_coefficient_mu     0.607 
_exptl_absorpt_correction_type    'multi-scan' 
_exptl_absorpt_correction_T_min   0.7933 
_exptl_absorpt_correction_T_max   0.8882 
_exptl_absorpt_process_details    
;
SCALE3 ABSPACK, CrysAlisPro, Agilent Technologies (2012) 
;  
_exptl_special_details 
; 
 ? 
; 
 
_diffrn_ambient_temperature       100(2) 
_diffrn_radiation_wavelength      0.71073 
_diffrn_radiation_type            MoK\a 
_diffrn_radiation_source          'Enhance (Mo) X-ray Source' 
_diffrn_radiation_monochromator   graphite 
_diffrn_measurement_device_type   'Xcalibur, Eos' 
_diffrn_measurement_method        '\w scans'
_diffrn_detector_area_resol_mean  ? 
_diffrn_standards_number          ? 
_diffrn_standards_interval_count  ? 
_diffrn_standards_interval_time   ? 
_diffrn_standards_decay_%         ? 
_diffrn_reflns_number             20369 
_diffrn_reflns_av_R_equivalents   0.0797 
_diffrn_reflns_av_sigmaI/netI     0.1298 
_diffrn_reflns_limit_h_min        -11 
_diffrn_reflns_limit_h_max        12 
_diffrn_reflns_limit_k_min        -14 
_diffrn_reflns_limit_k_max        14 
_diffrn_reflns_limit_l_min        -23 
_diffrn_reflns_limit_l_max        23 
_diffrn_reflns_theta_min          2.91 
_diffrn_reflns_theta_max          25.00 
_reflns_number_total              8450 
_reflns_number_gt                 5725 
_reflns_threshold_expression      >2sigma(I) 
 
_computing_data_collection        'CrysAlisPro, Agilent Technologies'  
_computing_cell_refinement        'CrysAlisPro, Agilent Technologies'  
_computing_data_reduction         'CrysAlisPro, Agilent Technologies'  
_computing_structure_solution     'SHELXS-97 (Sheldrick, 1990)' 
_computing_structure_refinement   'SHELXL-97 (Sheldrick, 1997)' 
_computing_molecular_graphics     'SHELXTL  (Sheldrick, 2000)' 
_computing_publication_material   'SHELXTL  (Sheldrick, 2000)' 
 
_refine_special_details 
; 
 Refinement of F^2^ against ALL reflections.  The weighted R-factor wR and 
 goodness of fit S are based on F^2^, conventional R-factors R are based 
 on F, with F set to zero for negative F^2^. The threshold expression of 
 F^2^ > 2sigma(F^2^) is used only for calculating R-factors(gt) etc. and is 
 not relevant to the choice of reflections for refinement.  R-factors based 
 on F^2^ are statistically about twice as large as those based on F, and R- 
 factors based on ALL data will be even larger. 
; 
 
_refine_ls_structure_factor_coef  Fsqd  
_refine_ls_matrix_type            full 
_refine_ls_weighting_scheme       calc  
_refine_ls_weighting_details 
 'calc w=1/[\s^2^(Fo^2^)+(0.0001P)^2^+0.0000P] where P=(Fo^2^+2Fc^2^)/3' 
_atom_sites_solution_primary      direct 
_atom_sites_solution_secondary    difmap 
_atom_sites_solution_hydrogens    geom 
_refine_ls_hydrogen_treatment     constr 
_refine_ls_extinction_method      none 
_refine_ls_extinction_coef        ? 
_refine_ls_number_reflns          8450 
_refine_ls_number_parameters      576 
_refine_ls_number_restraints      43 
_refine_ls_R_factor_all           0.0997 
_refine_ls_R_factor_gt            0.0598 
_refine_ls_wR_factor_ref          0.0886 
_refine_ls_wR_factor_gt           0.0791 
_refine_ls_goodness_of_fit_ref    0.992 
_refine_ls_restrained_S_all       0.993 
_refine_ls_shift/su_max           0.001 
_refine_ls_shift/su_mean          0.000 
 
loop_ 
 _atom_site_label 
 _atom_site_type_symbol 
 _atom_site_fract_x 
 _atom_site_fract_y 
 _atom_site_fract_z 
 _atom_site_U_iso_or_equiv 
 _atom_site_adp_type 
 _atom_site_occupancy 
 _atom_site_symmetry_multiplicity 
 _atom_site_calc_flag 
 _atom_site_refinement_flags 
 _atom_site_disorder_assembly 
 _atom_site_disorder_group 
Ga1 Ga 0.10279(2) 0.23033(2) 0.262110(14) 0.02060(7) Uani 1 1 d . . . 
N1 N 0.03814(16) 0.36921(13) 0.29833(9) 0.0171(5) Uani 1 1 d . . . 
N2 N -0.07720(16) 0.21601(13) 0.24389(9) 0.0181(5) Uani 1 1 d . . . 
C1 C -0.0890(2) 0.37942(16) 0.29751(10) 0.0163(6) Uani 1 1 d . . . 
C2 C -0.1497(2) 0.29792(16) 0.26805(11) 0.0170(6) Uani 1 1 d . . . 
C3 C -0.2880(2) 0.32788(17) 0.27019(11) 0.0202(6) Uani 1 1 d . . . 
C4 C -0.3045(2) 0.42664(17) 0.30179(11) 0.0217(6) Uani 1 1 d . . . 
C5 C -0.1868(2) 0.46156(16) 0.31984(11) 0.0181(6) Uani 1 1 d . . . 
C6 C -0.1895(2) 0.55605(16) 0.35047(11) 0.0210(6) Uani 1 1 d . . . 
H6A H -0.1128 0.5827 0.3624 0.025 Uiso 1 1 calc R . . 
C7 C -0.3087(2) 0.61366(18) 0.36411(12) 0.0278(7) Uani 1 1 d . . . 
H7A H -0.3107 0.6784 0.3864 0.033 Uiso 1 1 calc R . . 
C8 C -0.4215(2) 0.57979(18) 0.34643(12) 0.0318(7) Uani 1 1 d . . . 
H8A H -0.4995 0.6211 0.3566 0.038 Uiso 1 1 calc R . . 
C9 C -0.4229(2) 0.48403(18) 0.31330(12) 0.0270(7) Uani 1 1 d . . . 
C10 C -0.5297(2) 0.4385(2) 0.29020(14) 0.0404(8) Uani 1 1 d . . . 
H10A H -0.6124 0.4749 0.2960 0.048 Uiso 1 1 calc R . . 
C11 C -0.5149(2) 0.3429(2) 0.25975(14) 0.0408(8) Uani 1 1 d . . . 
H11A H -0.5880 0.3145 0.2449 0.049 Uiso 1 1 calc R . . 
C12 C -0.3939(2) 0.28501(19) 0.24971(13) 0.0333(7) Uani 1 1 d . . . 
H12A H -0.3861 0.2180 0.2293 0.040 Uiso 1 1 calc R . . 
C13 C 0.10347(19) 0.46139(16) 0.31561(11) 0.0156(6) Uani 1 1 d . . . 
C14 C 0.1174(2) 0.56262(16) 0.26644(11) 0.0195(6) Uani 1 1 d . . . 
C15 C 0.1710(2) 0.65424(17) 0.28654(12) 0.0242(7) Uani 1 1 d . . . 
H15A H 0.1803 0.7237 0.2546 0.029 Uiso 1 1 calc R . . 
C16 C 0.2110(2) 0.64698(17) 0.35168(12) 0.0244(7) Uani 1 1 d . . . 
H16A H 0.2442 0.7117 0.3648 0.029 Uiso 1 1 calc R . . 
C17 C 0.2024(2) 0.54441(17) 0.39780(12) 0.0245(6) Uani 1 1 d . . . 
H17A H 0.2331 0.5386 0.4420 0.029 Uiso 1 1 calc R . . 
C18 C 0.1498(2) 0.44989(17) 0.38057(11) 0.0201(6) Uani 1 1 d . . . 
C19 C 0.0781(2) 0.57241(17) 0.19366(11) 0.0253(7) Uani 1 1 d . . . 
H19A H 0.0466 0.4966 0.1891 0.030 Uiso 1 1 calc R . . 
C20 C -0.0312(2) 0.66491(18) 0.17713(13) 0.0359(8) Uani 1 1 d . . . 
H20A H -0.1059 0.6459 0.2090 0.054 Uiso 1 1 calc R . . 
H20B H -0.0540 0.6674 0.1300 0.054 Uiso 1 1 calc R . . 
H20C H -0.0032 0.7401 0.1818 0.054 Uiso 1 1 calc R . . 
C21 C 0.1941(2) 0.59605(19) 0.14220(12) 0.0365(8) Uani 1 1 d . . . 
H21A H 0.2623 0.5365 0.1536 0.055 Uiso 1 1 calc R . . 
H21B H 0.2247 0.6716 0.1442 0.055 Uiso 1 1 calc R . . 
H21C H 0.1694 0.5952 0.0958 0.055 Uiso 1 1 calc R . . 
C22 C 0.1401(2) 0.33751(17) 0.43208(12) 0.0279(7) Uani 1 1 d . . . 
H22A H 0.1035 0.2803 0.4088 0.033 Uiso 1 1 calc R . . 
C23 C 0.2727(2) 0.2891(2) 0.45314(15) 0.0550(9) Uani 1 1 d . . . 
H23A H 0.3244 0.2701 0.4129 0.082 Uiso 1 1 calc R . . 
H23B H 0.2641 0.2196 0.4880 0.082 Uiso 1 1 calc R . . 
H23C H 0.3144 0.3467 0.4720 0.082 Uiso 1 1 calc R . . 
C24 C 0.0510(3) 0.35324(19) 0.49379(12) 0.0462(9) Uani 1 1 d . . . 
H24A H 0.0445 0.2794 0.5250 0.069 Uiso 1 1 calc R . . 
H24B H -0.0338 0.3813 0.4788 0.069 Uiso 1 1 calc R . . 
H24C H 0.0845 0.4092 0.5176 0.069 Uiso 1 1 calc R . . 
C25 C -0.1298(2) 0.14041(16) 0.20611(11) 0.0191(6) Uani 1 1 d . . . 
C26 C -0.1437(2) 0.17717(18) 0.13598(12) 0.0286(7) Uani 1 1 d . . . 
C27 C -0.1998(2) 0.10489(19) 0.10141(13) 0.0363(8) Uani 1 1 d . . . 
H27A H -0.2131 0.1297 0.0542 0.044 Uiso 1 1 calc R . . 
C28 C -0.2374(2) -0.00242(19) 0.13308(13) 0.0382(8) Uani 1 1 d . . . 
H28A H -0.2750 -0.0509 0.1079 0.046 Uiso 1 1 calc R . . 
C29 C -0.2194(2) -0.03838(18) 0.20247(12) 0.0299(7) Uani 1 1 d . . . 
H29A H -0.2432 -0.1128 0.2241 0.036 Uiso 1 1 calc R . . 
C30 C -0.1677(2) 0.03126(17) 0.24063(12) 0.0223(6) Uani 1 1 d . . . 
C31 C -0.1008(2) 0.29381(18) 0.09779(12) 0.0361(8) Uani 1 1 d . . . 
H31A H -0.0550 0.3291 0.1303 0.043 Uiso 1 1 calc R . . 
C32 C -0.2141(3) 0.3744(2) 0.07634(14) 0.0594(10) Uani 1 1 d . . . 
H32A H -0.1840 0.4489 0.0533 0.089 Uiso 1 1 calc R . . 
H32B H -0.2700 0.3848 0.1170 0.089 Uiso 1 1 calc R . . 
H32C H -0.2617 0.3415 0.0449 0.089 Uiso 1 1 calc R . . 
C33 C -0.0083(3) 0.2803(2) 0.03727(13) 0.0453(9) Uani 1 1 d . . . 
H33A H 0.0188 0.3561 0.0145 0.068 Uiso 1 1 calc R . . 
H33B H -0.0500 0.2443 0.0049 0.068 Uiso 1 1 calc R . . 
H33C H 0.0666 0.2318 0.0531 0.068 Uiso 1 1 calc R . . 
C34 C -0.1549(2) -0.00711(18) 0.31718(12) 0.0285(7) Uani 1 1 d . . . 
H34A H -0.1128 0.0544 0.3342 0.034 Uiso 1 1 calc R . . 
C35 C -0.2857(2) -0.0214(2) 0.35581(14) 0.0428(8) Uani 1 1 d . . . 
H35A H -0.3376 0.0511 0.3467 0.064 Uiso 1 1 calc R . . 
H35B H -0.2753 -0.0422 0.4051 0.064 Uiso 1 1 calc R . . 
H35C H -0.3284 -0.0822 0.3405 0.064 Uiso 1 1 calc R . . 
C36 C -0.0686(2) -0.11896(17) 0.33065(13) 0.0394(8) Uani 1 1 d . . . 
H36A H 0.0174 -0.1046 0.3094 0.059 Uiso 1 1 calc R . . 
H36B H -0.1043 -0.1789 0.3110 0.059 Uiso 1 1 calc R . . 
H36C H -0.0642 -0.1443 0.3802 0.059 Uiso 1 1 calc R . . 
C37 C 0.2142(2) 0.25821(17) 0.18030(12) 0.0239(6) Uani 1 1 d . . . 
C38 C 0.2849(2) 0.26399(17) 0.12939(13) 0.0270(7) Uani 1 1 d . . . 
C39 C 0.3674(2) 0.26457(18) 0.06730(13) 0.0321(7) Uani 1 1 d . . . 
C40 C 0.3818(3) 0.3658(2) 0.02126(14) 0.0521(10) Uani 1 1 d . . . 
H40A H 0.3411 0.4355 0.0316 0.062 Uiso 1 1 calc R . . 
C41 C 0.4561(3) 0.3661(2) -0.04063(15) 0.0587(7) Uani 1 1 d . . . 
H41A H 0.4650 0.4356 -0.0726 0.070 Uiso 1 1 calc R . . 
C42 C 0.5163(3) 0.2643(2) -0.05464(15) 0.0513(9) Uani 1 1 d U . . 
H42A H 0.5655 0.2636 -0.0969 0.062 Uiso 1 1 calc R . . 
C43 C 0.5055(3) 0.1637(2) -0.00775(15) 0.0587(7) Uani 1 1 d U . . 
H43A H 0.5491 0.0945 -0.0171 0.070 Uiso 1 1 calc R . . 
C44 C 0.4309(2) 0.1640(2) 0.05291(14) 0.0450(9) Uani 1 1 d . . . 
H44A H 0.4232 0.0945 0.0850 0.054 Uiso 1 1 calc R . . 
C45 C 0.1587(2) 0.11015(17) 0.33463(12) 0.0261(7) Uani 1 1 d . A . 
C46 C 0.1974(2) 0.03800(17) 0.37990(12) 0.0254(7) Uani 1 1 d . . . 
C47 C 0.2440(3) -0.0520(2) 0.43196(17) 0.0279(10) Uani 0.750(2) 1 d P A 1 
C48 C 0.3714(3) -0.0893(3) 0.42808(19) 0.0448(12) Uani 0.750(2) 1 d P A 1 
H48A H 0.4265 -0.0549 0.3909 0.054 Uiso 0.750(2) 1 calc PR A 1 
C49 C 0.4211(4) -0.1763(3) 0.4775(2) 0.0554(13) Uani 0.750(2) 1 d PU A 1 
H49A H 0.5091 -0.2005 0.4743 0.067 Uiso 0.750(2) 1 calc PR A 1 
C50 C 0.3416(4) -0.2263(3) 0.5308(2) 0.0549(14) Uani 0.750(2) 1 d P A 1 
H50A H 0.3748 -0.2864 0.5642 0.066 Uiso 0.750(2) 1 calc PR A 1 
C51 C 0.2126(4) -0.1905(3) 0.53673(19) 0.0475(9) Uani 0.750(2) 1 d P A 1 
H51A H 0.1583 -0.2248 0.5743 0.057 Uiso 0.750(2) 1 calc PR A 1 
C52 C 0.1645(3) -0.1039(3) 0.48707(18) 0.0344(8) Uani 0.750(2) 1 d P A 1 
H52A H 0.0765 -0.0796 0.4905 0.041 Uiso 0.750(2) 1 calc PR A 1 
C47' C 0.2553(5) -0.0406(4) 0.4367(3) 0.020(2) Uani 0.250(2) 1 d PGU A 2 
C48' C 0.3858(5) -0.0426(5) 0.4438(3) 0.023(2) Uani 0.250(2) 1 d PGU A 2 
H48B H 0.4373 0.0103 0.4138 0.028 Uiso 0.250(2) 1 calc PR A 2 
C49' C 0.4411(6) -0.1221(6) 0.4950(3) 0.023(2) Uani 0.250(2) 1 d PGU A 2 
H49B H 0.5303 -0.1234 0.4999 0.028 Uiso 0.250(2) 1 calc PR A 2 
C50' C 0.3659(8) -0.1995(5) 0.5390(3) 0.040(3) Uani 0.250(2) 1 d PGU A 2 
H50B H 0.4037 -0.2538 0.5739 0.048 Uiso 0.250(2) 1 calc PR A 2 
C51' C 0.2354(7) -0.1975(5) 0.5318(3) 0.0475(9) Uani 0.250(2) 1 d PGU A 2 
H51B H 0.1839 -0.2504 0.5618 0.057 Uiso 0.250(2) 1 calc PR A 2 
C52' C 0.1801(5) -0.1181(5) 0.4806(3) 0.0344(8) Uani 0.250(2) 1 d PGU A 2 
H52B H 0.0909 -0.1167 0.4757 0.041 Uiso 0.250(2) 1 calc PR A 2 
O1S O 0.71230(16) 0.09552(13) -0.15840(9) 0.0389(5) Uani 1 1 d . . . 
C1S C 0.6637(3) 0.0771(2) -0.22047(14) 0.0461(9) Uani 1 1 d . . . 
H1SA H 0.6442 -0.0045 -0.2165 0.055 Uiso 1 1 calc R . . 
H1SB H 0.7282 0.0958 -0.2594 0.055 Uiso 1 1 calc R . . 
C2S C 0.5464(3) 0.1521(2) -0.23240(16) 0.0649(11) Uani 1 1 d . . . 
H2SA H 0.5158 0.1454 -0.2767 0.097 Uiso 1 1 calc R . . 
H2SB H 0.5652 0.2321 -0.2326 0.097 Uiso 1 1 calc R . . 
H2SC H 0.4805 0.1284 -0.1958 0.097 Uiso 1 1 calc R . . 
C3S C 0.8329(2) 0.03604(19) -0.14570(14) 0.0401(8) Uani 1 1 d . . . 
H3SA H 0.8993 0.0692 -0.1804 0.048 Uiso 1 1 calc R . . 
H3SB H 0.8285 -0.0462 -0.1486 0.048 Uiso 1 1 calc R . . 
C4S C 0.8659(3) 0.0476(2) -0.07608(13) 0.0484(9) Uani 1 1 d . . . 
H4SA H 0.9509 0.0108 -0.0676 0.073 Uiso 1 1 calc R . . 
H4SB H 0.8027 0.0103 -0.0418 0.073 Uiso 1 1 calc R . . 
H4SC H 0.8658 0.1293 -0.0730 0.073 Uiso 1 1 calc R . . 
 
loop_ 
 _atom_site_aniso_label 
 _atom_site_aniso_U_11 
 _atom_site_aniso_U_22 
 _atom_site_aniso_U_33 
 _atom_site_aniso_U_23 
 _atom_site_aniso_U_13 
 _atom_site_aniso_U_12 
Ga1 0.01480(13) 0.02100(13) 0.02415(14) 0.00149(10) -0.00272(11) -0.00061(10) 
N1 0.0130(10) 0.0187(9) 0.0180(10) 0.0029(7) -0.0045(9) -0.0013(7) 
N2 0.0136(10) 0.0202(9) 0.0185(11) 0.0053(8) -0.0043(9) -0.0046(7) 
C1 0.0140(11) 0.0206(11) 0.0110(12) 0.0068(9) 0.0003(10) -0.0029(9) 
C2 0.0139(12) 0.0196(11) 0.0153(12) 0.0022(9) -0.0006(10) 0.0008(9) 
C3 0.0144(12) 0.0238(12) 0.0202(13) 0.0025(9) -0.0004(11) -0.0027(9) 
C4 0.0158(12) 0.0248(12) 0.0216(13) 0.0016(10) 0.0026(11) -0.0009(9) 
C5 0.0130(11) 0.0214(11) 0.0168(13) 0.0039(9) 0.0020(10) -0.0015(9) 
C6 0.0175(12) 0.0214(12) 0.0224(13) 0.0010(9) -0.0022(11) -0.0010(9) 
C7 0.0282(14) 0.0253(13) 0.0287(15) -0.0041(10) 0.0034(12) -0.0012(10) 
C8 0.0204(13) 0.0369(14) 0.0368(16) -0.0074(11) -0.0004(13) 0.0076(11) 
C9 0.0140(12) 0.0361(13) 0.0298(15) -0.0049(11) 0.0029(12) 0.0000(10) 
C10 0.0195(14) 0.0542(16) 0.0502(18) -0.0182(13) -0.0031(14) 0.0027(12) 
C11 0.0158(14) 0.0563(16) 0.0541(18) -0.0172(13) -0.0086(14) -0.0017(12) 
C12 0.0262(14) 0.0379(14) 0.0372(16) -0.0096(11) -0.0039(13) -0.0028(11) 
C13 0.0097(11) 0.0161(11) 0.0211(13) -0.0045(9) -0.0004(10) 0.0019(9) 
C14 0.0158(12) 0.0170(11) 0.0232(13) -0.0008(9) 0.0042(11) 0.0027(9) 
C15 0.0191(13) 0.0203(12) 0.0308(14) -0.0006(10) 0.0039(12) -0.0017(10) 
C16 0.0143(12) 0.0239(12) 0.0373(15) -0.0112(10) 0.0005(12) -0.0039(9) 
C17 0.0161(12) 0.0320(13) 0.0268(14) -0.0082(10) -0.0051(11) 0.0025(10) 
C18 0.0174(12) 0.0205(12) 0.0210(13) -0.0012(9) -0.0027(11) 0.0032(9) 
C19 0.0322(14) 0.0213(12) 0.0207(14) 0.0033(10) -0.0010(12) -0.0074(10) 
C20 0.0266(14) 0.0459(15) 0.0308(16) 0.0068(12) -0.0039(13) -0.0044(12) 
C21 0.0381(16) 0.0421(15) 0.0243(15) 0.0033(11) 0.0046(13) 0.0008(12) 
C22 0.0367(15) 0.0245(13) 0.0211(14) 0.0029(10) -0.0110(12) 0.0008(11) 
C23 0.0594(19) 0.0360(16) 0.067(2) 0.0078(14) -0.0386(17) 0.0122(14) 
C24 0.073(2) 0.0376(15) 0.0239(16) 0.0082(12) -0.0027(16) -0.0110(14) 
C25 0.0139(12) 0.0220(12) 0.0210(13) -0.0040(9) 0.0014(11) -0.0012(9) 
C26 0.0307(14) 0.0310(13) 0.0244(14) -0.0024(10) -0.0071(12) -0.0035(11) 
C27 0.0434(17) 0.0450(15) 0.0215(14) -0.0038(11) -0.0067(13) -0.0087(12) 
C28 0.0355(16) 0.0446(15) 0.0394(17) -0.0148(12) -0.0043(14) -0.0156(12) 
C29 0.0284(14) 0.0239(12) 0.0364(16) -0.0014(11) 0.0008(13) -0.0083(10) 
C30 0.0159(12) 0.0224(12) 0.0287(14) -0.0048(10) 0.0011(11) -0.0047(9) 
C31 0.0549(18) 0.0281(13) 0.0246(15) 0.0027(11) -0.0082(14) -0.0099(12) 
C32 0.085(2) 0.0442(17) 0.042(2) 0.0093(14) -0.0071(19) 0.0040(16) 
C33 0.0541(18) 0.0502(16) 0.0279(16) 0.0094(13) -0.0033(15) -0.0183(14) 
C34 0.0344(15) 0.0282(13) 0.0213(14) 0.0053(10) -0.0039(12) -0.0129(11) 
C35 0.0393(17) 0.0474(16) 0.0378(18) 0.0041(13) 0.0049(15) -0.0142(13) 
C36 0.0400(16) 0.0343(14) 0.0392(17) 0.0100(12) -0.0086(14) -0.0039(12) 
C37 0.0196(13) 0.0197(12) 0.0334(15) -0.0055(10) -0.0065(12) -0.0003(9) 
C38 0.0202(13) 0.0251(12) 0.0366(15) -0.0072(10) 0.0000(12) -0.0053(10) 
C39 0.0293(15) 0.0335(14) 0.0335(16) -0.0073(11) 0.0044(13) -0.0063(11) 
C40 0.063(2) 0.0370(15) 0.0456(19) 0.0063(13) 0.0164(17) 0.0138(14) 
C41 0.0598(15) 0.0570(13) 0.0532(15) -0.0053(10) 0.0239(13) -0.0045(11) 
C42 0.0437(18) 0.0683(18) 0.0418(18) -0.0158(13) 0.0191(16) -0.0132(14) 
C43 0.0598(15) 0.0570(13) 0.0532(15) -0.0053(10) 0.0239(13) -0.0045(11) 
C44 0.0437(18) 0.0408(15) 0.0483(19) -0.0084(13) 0.0097(16) -0.0014(13) 
C45 0.0269(14) 0.0187(12) 0.0317(15) -0.0004(10) -0.0040(12) -0.0025(10) 
C46 0.0189(13) 0.0251(12) 0.0298(15) -0.0002(10) 0.0011(12) 0.0010(10) 
C47 0.0242(19) 0.0249(18) 0.032(2) 0.0030(14) -0.0094(17) 0.0068(14) 
C48 0.037(2) 0.045(2) 0.044(3) 0.0153(18) -0.001(2) -0.0007(17) 
C49 0.043(2) 0.061(2) 0.055(2) 0.0111(18) -0.0143(19) 0.0067(17) 
C50 0.067(3) 0.048(2) 0.037(2) 0.0229(18) -0.013(2) 0.011(2) 
C51 0.0568(19) 0.0465(15) 0.0338(17) 0.0083(12) -0.0031(15) -0.0057(14) 
C52 0.0316(15) 0.0334(14) 0.0361(16) -0.0018(12) -0.0034(13) 0.0028(12) 
C47' 0.019(4) 0.020(3) 0.021(4) -0.002(3) 0.000(3) -0.001(3) 
C48' 0.019(3) 0.025(3) 0.022(3) 0.004(3) -0.002(3) 0.001(3) 
C49' 0.021(3) 0.023(3) 0.022(3) 0.002(3) -0.003(3) 0.007(3) 
C50' 0.040(4) 0.040(4) 0.037(4) -0.004(3) -0.004(3) 0.001(3) 
C51' 0.0568(19) 0.0465(15) 0.0338(17) 0.0083(12) -0.0031(15) -0.0057(14) 
C52' 0.0316(15) 0.0334(14) 0.0361(16) -0.0018(12) -0.0034(13) 0.0028(12) 
O1S 0.0417(11) 0.0393(9) 0.0364(11) -0.0077(8) -0.0009(10) -0.0069(8) 
C1S 0.0571(19) 0.0471(16) 0.0347(17) -0.0015(13) -0.0044(16) -0.0199(14) 
C2S 0.0395(19) 0.103(2) 0.050(2) 0.0037(18) -0.0058(18) -0.0249(17) 
C3S 0.0366(16) 0.0301(14) 0.0533(19) -0.0076(12) 0.0000(15) -0.0025(12) 
C4S 0.058(2) 0.0412(16) 0.0465(19) -0.0051(13) -0.0111(17) -0.0051(14) 
 
_geom_special_details 
; 
 All esds (except the esd in the dihedral angle between two l.s. planes) 
 are estimated using the full covariance matrix.  The cell esds are taken 
 into account individually in the estimation of esds in distances, angles 
 and torsion angles; correlations between esds in cell parameters are only 
 used when they are defined by crystal symmetry.  An approximate (isotropic) 
 treatment of cell esds is used for estimating esds involving l.s. planes. 
; 
 
loop_ 
 _geom_bond_atom_site_label_1 
 _geom_bond_atom_site_label_2 
 _geom_bond_distance 
 _geom_bond_site_symmetry_2 
 _geom_bond_publ_flag 
Ga1 C37 1.917(2) . ? 
Ga1 C45 1.932(2) . ? 
Ga1 N1 1.9665(16) . ? 
Ga1 N2 1.9812(17) . ? 
N1 C1 1.335(3) . ? 
N1 C13 1.436(3) . ? 
N2 C2 1.324(2) . ? 
N2 C25 1.432(3) . ? 
C1 C2 1.426(3) . ? 
C1 C5 1.462(3) . ? 
C2 C3 1.471(3) . ? 
C3 C12 1.376(3) . ? 
C3 C4 1.417(3) . ? 
C4 C9 1.397(3) . ? 
C4 C5 1.425(3) . ? 
C5 C6 1.364(3) . ? 
C6 C7 1.413(3) . ? 
C6 H6A 0.9500 . ? 
C7 C8 1.371(3) . ? 
C7 H7A 0.9500 . ? 
C8 C9 1.411(3) . ? 
C8 H8A 0.9500 . ? 
C9 C10 1.422(3) . ? 
C10 C11 1.370(3) . ? 
C10 H10A 0.9500 . ? 
C11 C12 1.418(3) . ? 
C11 H11A 0.9500 . ? 
C12 H12A 0.9500 . ? 
C13 C18 1.398(3) . ? 
C13 C14 1.412(3) . ? 
C14 C15 1.391(3) . ? 
C14 C19 1.519(3) . ? 
C15 C16 1.381(3) . ? 
C15 H15A 0.9500 . ? 
C16 C17 1.387(3) . ? 
C16 H16A 0.9500 . ? 
C17 C18 1.390(3) . ? 
C17 H17A 0.9500 . ? 
C18 C22 1.530(3) . ? 
C19 C21 1.534(3) . ? 
C19 C20 1.544(3) . ? 
C19 H19A 1.0000 . ? 
C20 H20A 0.9800 . ? 
C20 H20B 0.9800 . ? 
C20 H20C 0.9800 . ? 
C21 H21A 0.9800 . ? 
C21 H21B 0.9800 . ? 
C21 H21C 0.9800 . ? 
C22 C24 1.512(3) . ? 
C22 C23 1.531(3) . ? 
C22 H22A 1.0000 . ? 
C23 H23A 0.9800 . ? 
C23 H23B 0.9800 . ? 
C23 H23C 0.9800 . ? 
C24 H24A 0.9800 . ? 
C24 H24B 0.9800 . ? 
C24 H24C 0.9800 . ? 
C25 C26 1.401(3) . ? 
C25 C30 1.418(3) . ? 
C26 C27 1.379(3) . ? 
C26 C31 1.531(3) . ? 
C27 C28 1.382(3) . ? 
C27 H27A 0.9500 . ? 
C28 C29 1.393(3) . ? 
C28 H28A 0.9500 . ? 
C29 C30 1.381(3) . ? 
C29 H29A 0.9500 . ? 
C30 C34 1.522(3) . ? 
C31 C33 1.508(3) . ? 
C31 C32 1.512(3) . ? 
C31 H31A 1.0000 . ? 
C32 H32A 0.9800 . ? 
C32 H32B 0.9800 . ? 
C32 H32C 0.9800 . ? 
C33 H33A 0.9800 . ? 
C33 H33B 0.9800 . ? 
C33 H33C 0.9800 . ? 
C34 C35 1.524(3) . ? 
C34 C36 1.546(3) . ? 
C34 H34A 1.0000 . ? 
C35 H35A 0.9800 . ? 
C35 H35B 0.9800 . ? 
C35 H35C 0.9800 . ? 
C36 H36A 0.9800 . ? 
C36 H36B 0.9800 . ? 
C36 H36C 0.9800 . ? 
C37 C38 1.200(3) . ? 
C38 C39 1.448(3) . ? 
C39 C40 1.380(3) . ? 
C39 C44 1.387(3) . ? 
C40 C41 1.402(4) . ? 
C40 H40A 0.9500 . ? 
C41 C42 1.384(3) . ? 
C41 H41A 0.9500 . ? 
C42 C43 1.379(4) . ? 
C42 H42A 0.9500 . ? 
C43 C44 1.384(4) . ? 
C43 H43A 0.9500 . ? 
C44 H44A 0.9500 . ? 
C45 C46 1.200(3) . ? 
C46 C47 1.435(3) . ? 
C46 C47' 1.471(5) . ? 
C47 C48 1.381(4) . ? 
C47 C52 1.399(4) . ? 
C48 C49 1.394(4) . ? 
C48 H48A 0.9500 . ? 
C49 C50 1.367(5) . ? 
C49 H49A 0.9500 . ? 
C50 C51 1.395(5) . ? 
C50 H50A 0.9500 . ? 
C51 C52 1.387(4) . ? 
C51 H51A 0.9500 . ? 
C52 H52A 0.9500 . ? 
C47' C48' 1.3900 . ? 
C47' C52' 1.3900 . ? 
C48' C49' 1.3900 . ? 
C48' H48B 0.9500 . ? 
C49' C50' 1.3900 . ? 
C49' H49B 0.9500 . ? 
C50' C51' 1.3900 . ? 
C50' H50B 0.9500 . ? 
C51' C52' 1.3900 . ? 
C51' H51B 0.9500 . ? 
C52' H52B 0.9500 . ? 
O1S C3S 1.425(3) . ? 
O1S C1S 1.431(3) . ? 
C1S C2S 1.477(4) . ? 
C1S H1SA 0.9900 . ? 
C1S H1SB 0.9900 . ? 
C2S H2SA 0.9800 . ? 
C2S H2SB 0.9800 . ? 
C2S H2SC 0.9800 . ? 
C3S C4S 1.486(4) . ? 
C3S H3SA 0.9900 . ? 
C3S H3SB 0.9900 . ? 
C4S H4SA 0.9800 . ? 
C4S H4SB 0.9800 . ? 
C4S H4SC 0.9800 . ? 
 
loop_ 
 _geom_angle_atom_site_label_1 
 _geom_angle_atom_site_label_2 
 _geom_angle_atom_site_label_3 
 _geom_angle 
 _geom_angle_site_symmetry_1 
 _geom_angle_site_symmetry_3 
 _geom_angle_publ_flag 
C37 Ga1 C45 116.81(9) . . ? 
C37 Ga1 N1 114.78(8) . . ? 
C45 Ga1 N1 111.07(8) . . ? 
C37 Ga1 N2 113.21(9) . . ? 
C45 Ga1 N2 111.49(8) . . ? 
N1 Ga1 N2 85.40(7) . . ? 
C1 N1 C13 118.86(16) . . ? 
C1 N1 Ga1 109.24(14) . . ? 
C13 N1 Ga1 131.36(13) . . ? 
C2 N2 C25 121.07(17) . . ? 
C2 N2 Ga1 108.97(14) . . ? 
C25 N2 Ga1 129.74(13) . . ? 
N1 C1 C2 117.84(18) . . ? 
N1 C1 C5 133.5(2) . . ? 
C2 C1 C5 108.64(18) . . ? 
N2 C2 C1 118.29(19) . . ? 
N2 C2 C3 133.1(2) . . ? 
C1 C2 C3 108.61(18) . . ? 
C12 C3 C4 118.7(2) . . ? 
C12 C3 C2 136.2(2) . . ? 
C4 C3 C2 105.02(19) . . ? 
C9 C4 C3 123.7(2) . . ? 
C9 C4 C5 123.8(2) . . ? 
C3 C4 C5 112.52(18) . . ? 
C6 C5 C4 118.34(19) . . ? 
C6 C5 C1 136.5(2) . . ? 
C4 C5 C1 105.20(18) . . ? 
C5 C6 C7 118.8(2) . . ? 
C5 C6 H6A 120.6 . . ? 
C7 C6 H6A 120.6 . . ? 
C8 C7 C6 122.6(2) . . ? 
C8 C7 H7A 118.7 . . ? 
C6 C7 H7A 118.7 . . ? 
C7 C8 C9 120.5(2) . . ? 
C7 C8 H8A 119.7 . . ? 
C9 C8 H8A 119.7 . . ? 
C4 C9 C8 115.9(2) . . ? 
C4 C9 C10 115.9(2) . . ? 
C8 C9 C10 128.1(2) . . ? 
C11 C10 C9 120.9(2) . . ? 
C11 C10 H10A 119.6 . . ? 
C9 C10 H10A 119.6 . . ? 
C10 C11 C12 122.1(2) . . ? 
C10 C11 H11A 118.9 . . ? 
C12 C11 H11A 118.9 . . ? 
C3 C12 C11 118.6(2) . . ? 
C3 C12 H12A 120.7 . . ? 
C11 C12 H12A 120.7 . . ? 
C18 C13 C14 121.6(2) . . ? 
C18 C13 N1 119.65(17) . . ? 
C14 C13 N1 118.70(19) . . ? 
C15 C14 C13 117.5(2) . . ? 
C15 C14 C19 120.33(18) . . ? 
C13 C14 C19 122.18(19) . . ? 
C16 C15 C14 121.77(19) . . ? 
C16 C15 H15A 119.1 . . ? 
C14 C15 H15A 119.1 . . ? 
C15 C16 C17 119.5(2) . . ? 
C15 C16 H16A 120.3 . . ? 
C17 C16 H16A 120.3 . . ? 
C16 C17 C18 121.2(2) . . ? 
C16 C17 H17A 119.4 . . ? 
C18 C17 H17A 119.4 . . ? 
C17 C18 C13 118.16(18) . . ? 
C17 C18 C22 120.7(2) . . ? 
C13 C18 C22 121.11(19) . . ? 
C14 C19 C21 110.23(19) . . ? 
C14 C19 C20 112.37(18) . . ? 
C21 C19 C20 110.81(17) . . ? 
C14 C19 H19A 107.7 . . ? 
C21 C19 H19A 107.7 . . ? 
C20 C19 H19A 107.7 . . ? 
C19 C20 H20A 109.5 . . ? 
C19 C20 H20B 109.5 . . ? 
H20A C20 H20B 109.5 . . ? 
C19 C20 H20C 109.5 . . ? 
H20A C20 H20C 109.5 . . ? 
H20B C20 H20C 109.5 . . ? 
C19 C21 H21A 109.5 . . ? 
C19 C21 H21B 109.5 . . ? 
H21A C21 H21B 109.5 . . ? 
C19 C21 H21C 109.5 . . ? 
H21A C21 H21C 109.5 . . ? 
H21B C21 H21C 109.5 . . ? 
C24 C22 C18 111.39(17) . . ? 
C24 C22 C23 111.5(2) . . ? 
C18 C22 C23 110.72(19) . . ? 
C24 C22 H22A 107.7 . . ? 
C18 C22 H22A 107.7 . . ? 
C23 C22 H22A 107.7 . . ? 
C22 C23 H23A 109.5 . . ? 
C22 C23 H23B 109.5 . . ? 
H23A C23 H23B 109.5 . . ? 
C22 C23 H23C 109.5 . . ? 
H23A C23 H23C 109.5 . . ? 
H23B C23 H23C 109.5 . . ? 
C22 C24 H24A 109.5 . . ? 
C22 C24 H24B 109.5 . . ? 
H24A C24 H24B 109.5 . . ? 
C22 C24 H24C 109.5 . . ? 
H24A C24 H24C 109.5 . . ? 
H24B C24 H24C 109.5 . . ? 
C26 C25 C30 121.7(2) . . ? 
C26 C25 N2 118.89(18) . . ? 
C30 C25 N2 119.36(19) . . ? 
C27 C26 C25 117.8(2) . . ? 
C27 C26 C31 120.0(2) . . ? 
C25 C26 C31 122.3(2) . . ? 
C26 C27 C28 122.2(2) . . ? 
C26 C27 H27A 118.9 . . ? 
C28 C27 H27A 118.9 . . ? 
C27 C28 C29 118.9(2) . . ? 
C27 C28 H28A 120.5 . . ? 
C29 C28 H28A 120.5 . . ? 
C30 C29 C28 121.8(2) . . ? 
C30 C29 H29A 119.1 . . ? 
C28 C29 H29A 119.1 . . ? 
C29 C30 C25 117.5(2) . . ? 
C29 C30 C34 121.03(19) . . ? 
C25 C30 C34 121.5(2) . . ? 
C33 C31 C32 111.3(2) . . ? 
C33 C31 C26 111.37(19) . . ? 
C32 C31 C26 111.2(2) . . ? 
C33 C31 H31A 107.6 . . ? 
C32 C31 H31A 107.6 . . ? 
C26 C31 H31A 107.6 . . ? 
C31 C32 H32A 109.5 . . ? 
C31 C32 H32B 109.5 . . ? 
H32A C32 H32B 109.5 . . ? 
C31 C32 H32C 109.5 . . ? 
H32A C32 H32C 109.5 . . ? 
H32B C32 H32C 109.5 . . ? 
C31 C33 H33A 109.5 . . ? 
C31 C33 H33B 109.5 . . ? 
H33A C33 H33B 109.5 . . ? 
C31 C33 H33C 109.5 . . ? 
H33A C33 H33C 109.5 . . ? 
H33B C33 H33C 109.5 . . ? 
C30 C34 C35 111.0(2) . . ? 
C30 C34 C36 110.46(19) . . ? 
C35 C34 C36 111.50(18) . . ? 
C30 C34 H34A 107.9 . . ? 
C35 C34 H34A 107.9 . . ? 
C36 C34 H34A 107.9 . . ? 
C34 C35 H35A 109.5 . . ? 
C34 C35 H35B 109.5 . . ? 
H35A C35 H35B 109.5 . . ? 
C34 C35 H35C 109.5 . . ? 
H35A C35 H35C 109.5 . . ? 
H35B C35 H35C 109.5 . . ? 
C34 C36 H36A 109.5 . . ? 
C34 C36 H36B 109.5 . . ? 
H36A C36 H36B 109.5 . . ? 
C34 C36 H36C 109.5 . . ? 
H36A C36 H36C 109.5 . . ? 
H36B C36 H36C 109.5 . . ? 
C38 C37 Ga1 173.46(18) . . ? 
C37 C38 C39 176.6(2) . . ? 
C40 C39 C44 119.4(2) . . ? 
C40 C39 C38 119.9(2) . . ? 
C44 C39 C38 120.7(2) . . ? 
C39 C40 C41 120.3(2) . . ? 
C39 C40 H40A 119.8 . . ? 
C41 C40 H40A 119.8 . . ? 
C42 C41 C40 119.3(2) . . ? 
C42 C41 H41A 120.3 . . ? 
C40 C41 H41A 120.3 . . ? 
C43 C42 C41 120.5(3) . . ? 
C43 C42 H42A 119.8 . . ? 
C41 C42 H42A 119.8 . . ? 
C42 C43 C44 119.8(3) . . ? 
C42 C43 H43A 120.1 . . ? 
C44 C43 H43A 120.1 . . ? 
C43 C44 C39 120.7(2) . . ? 
C43 C44 H44A 119.7 . . ? 
C39 C44 H44A 119.7 . . ? 
C46 C45 Ga1 177.4(2) . . ? 
C45 C46 C47 177.4(3) . . ? 
C45 C46 C47' 173.3(3) . . ? 
C47 C46 C47' 8.7(3) . . ? 
C48 C47 C52 118.4(3) . . ? 
C48 C47 C46 119.4(3) . . ? 
C52 C47 C46 122.2(3) . . ? 
C47 C48 C49 121.5(3) . . ? 
C47 C48 H48A 119.3 . . ? 
C49 C48 H48A 119.3 . . ? 
C50 C49 C48 119.2(3) . . ? 
C50 C49 H49A 120.4 . . ? 
C48 C49 H49A 120.4 . . ? 
C49 C50 C51 121.0(3) . . ? 
C49 C50 H50A 119.5 . . ? 
C51 C50 H50A 119.5 . . ? 
C52 C51 C50 119.1(3) . . ? 
C52 C51 H51A 120.4 . . ? 
C50 C51 H51A 120.4 . . ? 
C51 C52 C47 120.8(3) . . ? 
C51 C52 H52A 119.6 . . ? 
C47 C52 H52A 119.6 . . ? 
C48' C47' C52' 120.0 . . ? 
C48' C47' C46 120.3(3) . . ? 
C52' C47' C46 119.6(3) . . ? 
C47' C48' C49' 120.0 . . ? 
C47' C48' H48B 120.0 . . ? 
C49' C48' H48B 120.0 . . ? 
C48' C49' C50' 120.0 . . ? 
C48' C49' H49B 120.0 . . ? 
C50' C49' H49B 120.0 . . ? 
C51' C50' C49' 120.0 . . ? 
C51' C50' H50B 120.0 . . ? 
C49' C50' H50B 120.0 . . ? 
C50' C51' C52' 120.0 . . ? 
C50' C51' H51B 120.0 . . ? 
C52' C51' H51B 120.0 . . ? 
C51' C52' C47' 120.0 . . ? 
C51' C52' H52B 120.0 . . ? 
C47' C52' H52B 120.0 . . ? 
C3S O1S C1S 112.92(19) . . ? 
O1S C1S C2S 108.3(2) . . ? 
O1S C1S H1SA 110.0 . . ? 
C2S C1S H1SA 110.0 . . ? 
O1S C1S H1SB 110.0 . . ? 
C2S C1S H1SB 110.0 . . ? 
H1SA C1S H1SB 108.4 . . ? 
C1S C2S H2SA 109.5 . . ? 
C1S C2S H2SB 109.5 . . ? 
H2SA C2S H2SB 109.5 . . ? 
C1S C2S H2SC 109.5 . . ? 
H2SA C2S H2SC 109.5 . . ? 
H2SB C2S H2SC 109.5 . . ? 
O1S C3S C4S 108.5(2) . . ? 
O1S C3S H3SA 110.0 . . ? 
C4S C3S H3SA 110.0 . . ? 
O1S C3S H3SB 110.0 . . ? 
C4S C3S H3SB 110.0 . . ? 
H3SA C3S H3SB 108.4 . . ? 
C3S C4S H4SA 109.5 . . ? 
C3S C4S H4SB 109.5 . . ? 
H4SA C4S H4SB 109.5 . . ? 
C3S C4S H4SC 109.5 . . ? 
H4SA C4S H4SC 109.5 . . ? 
H4SB C4S H4SC 109.5 . . ? 
 
_diffrn_measured_fraction_theta_max    0.991 
_diffrn_reflns_theta_full              25.00 
_diffrn_measured_fraction_theta_full   0.991 
_refine_diff_density_max    0.541 
_refine_diff_density_min   -0.516 
_refine_diff_density_rms    0.067

_publ_section_references 
;
Data Collection, Reduction and Correction Program,
CrysAlis Pro  Software Package, Agilent Technologies (2012)
 
SCALE3 ABSPACK: Empirical absorption correction,
CrysAlis Pro  Software Package, Agilent Technologies (2012) 
  
Sheldrick G.M. (2000). SHELXTL v. 6.12, Structure Determination Software 
Suite, Bruker AXS, Madison, Wisconsin, USA. 
; 
